# Supplementary material for: Breeding of a High-Nisin-Yielding Bacterial Strain and Multiomics Analysis
Source: MDPI journal article supplement (doi:10.3390/fermentation8060255), 2022-05-27
Supplement: s1 [file s1]

Supplementary Materials

|                                                                                                                                               |   |
|-----------------------------------------------------------------------------------------------------------------------------------------------|---|
| Figure S1 Nisin titre standard curve                                                                                                          | 2 |
| Figure S2 Biomass curve of <i>L. lactis</i> A32 and lxl with increasing fermentation times                                                    | 3 |
| Table S1 Results of the nisin production stability of strains <i>L. lactis</i> A32 and A225                                                   | 4 |
| Table S2 Statistics of the genome sequencing data of <i>L. lactis</i> A32 and lxl                                                             | 5 |
| Table S3 GO functional categories of <i>L. lactis</i> A32 and lxl                                                                             | 6 |
| Table S4 Numbers and lengths of reads and numbers of expressed genes detected by transcriptome sequencing in control and acid-treated samples | 8 |

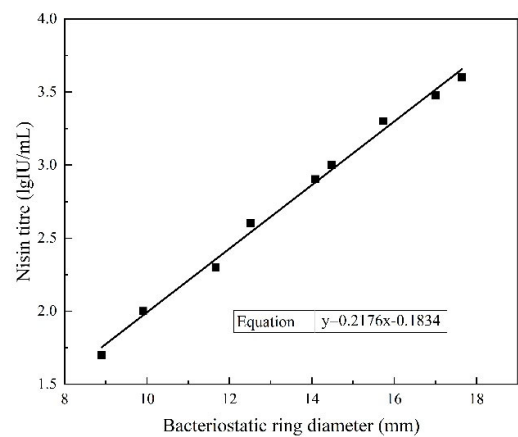

Figure S1 Nisin titre standard curve

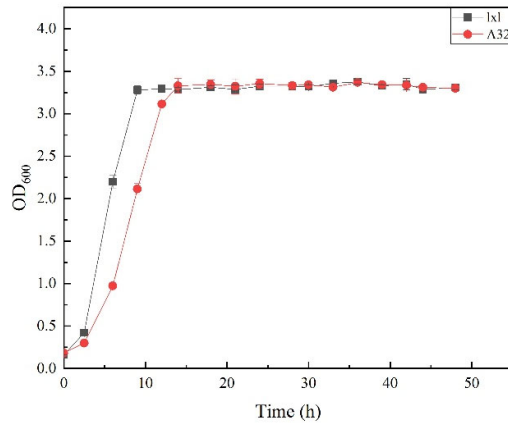

**Figure S2** Biomass curve of *L. lactis* A32 and lxl with increasing fermentation times

**Table S1.** Results of the nisin production stability of strains *L. lactis* A32 and A225.

| Generation    | F3   | F6   | F9   | F12  | F15  | F18  | F20  |
|---------------|------|------|------|------|------|------|------|
| Mutant strain |      |      |      |      |      |      |      |
| A32 (IU/mL)   | 5089 | 5081 | 5095 | 5109 | 5075 | 5083 | 5091 |
| A225 (IU/mL)  | 2589 | 2481 | 2395 | 2309 | 2275 | 2183 | 2091 |

**Table S2.** Statistics of the genome sequencing data of *L. lactis* A32 and lxl.

| Item             | A32                 | lxl                 |
|------------------|---------------------|---------------------|
| Raw bases (bp)   | 1087723800          | 1132569600          |
| Raw reads        | 7251492             | 7550464             |
| Raw Q20 (%)      | 1061634089 (97.6%)  | 1103022678 (97.39%) |
| Raw Q30 (%)      | 1010309134 (92.88%) | 1046233103 (92.38%) |
| Raw N (%)        | 33223 (0.0%)        | 34905 (0.0%)        |
| Raw GC (%)       | 374802794 (34.46%)  | 391690432 (34.58%)  |
| Clean bases (bp) | 1086215124          | 1130798432          |
| Clean reads      | 7244702             | 7542298             |
| Clean Q20 (%)    | 1060475729 (97.63%) | 1101675644 (97.42%) |
| Clean Q30 (%)    | 1009294227 (92.92%) | 1045061090 (92.42%) |
| Clean N (%)      | 16312 (0.0%)        | 24835 (0.0%)        |
| Clean GC (%)     | 374135882 (34.44%)  | 390898883 (34.57%)  |

**Table S3.** GO functional categories of *L. lactis* A32 and lxl.

| GO ontology        | GO functional category                        | No. A32 Genes | No. lxl Genes |
|--------------------|-----------------------------------------------|---------------|---------------|
| Biological Process | Cellular process                              | 1583          | 1577          |
|                    | Metabolic process                             | 1447          | 1443          |
|                    | Single-organism process                       | 1368          | 1366          |
|                    | Localization                                  | 512           | 511           |
|                    | Response to stimulus                          | 464           | 466           |
|                    | Cellular component organization or biogenesis | 457           | 457           |
|                    | Biological regulation                         | 454           | 453           |
|                    | Regulation of biological process              | 415           | 414           |
|                    | Multiorganism process                         | 157           | 157           |

|                    |                                                       |      |      |
|--------------------|-------------------------------------------------------|------|------|
|                    | Developmental process                                 | 129  | 130  |
|                    | Negative regulation of biological process             | 97   | 96   |
|                    | Growth                                                | 88   | 88   |
|                    | Reproduction                                          | 79   | 80   |
|                    | Signalling                                            | 76   | 78   |
|                    | Multicellular organismal process                      | 75   | 76   |
|                    | Locomotion                                            | 39   | 40   |
|                    | Positive regulation of biological process             | 32   | 32   |
|                    | Detoxification                                        | 20   | 20   |
|                    | Biological adhesion                                   | 19   | 19   |
|                    | Immune system process                                 | 9    | 9    |
|                    | Reproductive process                                  | 6    | 6    |
|                    | Rhythmic process                                      | 3    | 3    |
|                    | Cell aggregation                                      | 2    | 2    |
|                    | Cell killing                                          | 1    | 1    |
|                    | Presynaptic process involved in synaptic transmission | 1    | 1    |
|                    | Catalytic activity                                    | 1339 | 1335 |
|                    | Binding                                               | 1085 | 1084 |
|                    | Transporter activity                                  | 377  | 375  |
|                    | Nucleic acid binding transcription factor activity    | 143  | 143  |
|                    | Structural molecule activity                          | 123  | 123  |
|                    | Transcription factor activity, protein binding        | 43   | 40   |
|                    | Signal transducer activity                            | 36   | 38   |
| Molecular Function | Molecular function regulator                          | 29   | 29   |
|                    | Antioxidant activity                                  | 27   | 27   |
|                    | Molecular transducer activity                         | 27   | 27   |
|                    | Electron carrier activity                             | 23   | 24   |
|                    | Metallochaperone activity                             | 3    | 3    |
|                    | Translation regulator activity                        | 3    | 3    |
|                    | D-alanyl carrier activity                             | 1    | 1    |
|                    | Nutrient reservoir activity                           | 1    | 1    |
|                    | Cell                                                  | 1086 | 1085 |
|                    | Cell part                                             | 1084 | 1083 |
|                    | Membrane                                              | 639  | 638  |
|                    | Macromolecular complex                                | 471  | 469  |
|                    | Membrane part                                         | 467  | 465  |
|                    | Organelle                                             | 218  | 217  |
|                    | Organelle part                                        | 157  | 155  |
| Cellular Component | Extracellular region                                  | 42   | 43   |
|                    | Membrane-enclosed lumen                               | 35   | 33   |
|                    | Virion                                                | 22   | 22   |
|                    | Nucleoid                                              | 16   | 16   |
|                    | Virion part                                           | 13   | 13   |
|                    | Extracellular region part                             | 10   | 11   |
|                    | Viral occlusion body                                  | 5    | 5    |
|                    | Other organism                                        | 2    | 2    |
|                    | Other organism part                                   | 2    | 2    |
|                    | Synapse                                               | 1    | 1    |
|                    | Supramolecular fibre                                  | 1    | 1    |

---

**Table S4.** Numbers and lengths of reads and numbers of expressed genes detected by transcriptome sequencing in control and acid-treated samples.

| Sample name     | Total clean reads (million) | Clean Data (Gb) | Q20 (%) | Q30 (%) | No. expressed genes |
|-----------------|-----------------------------|-----------------|---------|---------|---------------------|
| A1 <sup>1</sup> | 16.05                       | 2.14            | 96.8    | 91.31   | 2205                |
| A2 <sup>1</sup> | 12.60                       | 1.65            | 96.76   | 91.22   | 2183                |
| A3 <sup>1</sup> | 13.86                       | 1.82            | 97.03   | 91.74   | 2185                |
| B1 <sup>1</sup> | 16.33                       | 2.15            | 96.92   | 91.54   | 2190                |
| B2 <sup>1</sup> | 14.32                       | 1.88            | 97.06   | 91.8    | 2182                |
| B3 <sup>1</sup> | 14.99                       | 1.94            | 97.11   | 91.91   | 2193                |

<sup>1</sup> A1-A3 are three parallel groups of the original strain atcc11454; B1-B3 are three parallel groups of mutant A32.
